# Supplementary material
Source: publisher site journal article supplement (https://vcs.pensoft.net/article/95767/download/suppl/31/)
Supplement: Supplementary file 1

**Supplementary material 1.** Comparison of models performance used in our study.

**Table S1.** The table shows a comparison of linear and quadratic (polynomial) models used in our study evaluated by their coefficient of determination ( $R^2$ ) and root mean-squared error (RMSE).

| Explanatory variable         | Model      | $R^2$  | RMSE   |
|------------------------------|------------|--------|--------|
| <b>Mires</b>                 |            |        |        |
| Mean annual temperature      | linear     | 0.005  | 27.86  |
| Mean annual temperature      | polynomial | 0.005  | 27.857 |
| Sum of annual precipitation  | linear     | 0.019  | 27.656 |
| Sum of annual precipitation  | polynomial | 0.052  | 27.191 |
| Aridity Index                | linear     | 0.061  | 27.056 |
| Aridity Index                | polynomial | 0.063  | 27.037 |
| Livestock density            | linear     | 0.028  | 27.527 |
| Livestock density            | polynomial | 0.048  | 27.247 |
| <b>Tall-forb communities</b> |            |        |        |
| Mean annual temperature      | linear     | 0.008  | 10.215 |
| Mean annual temperature      | polynomial | 0.01   | 10.206 |
| Sum of annual precipitation  | linear     | 0.04   | 10.051 |
| Sum of annual precipitation  | polynomial | 0.049  | 10.002 |
| Aridity Index                | linear     | 0.012  | 10.195 |
| Aridity Index                | polynomial | 0.014  | 10.185 |
| Livestock density            | linear     | 0.0002 | 10.255 |
| Livestock density            | polynomial | 0.011  | 10.202 |
| <b>Pseudosteppes</b>         |            |        |        |
| Mean annual temperature      | linear     | 0.152  | 19.268 |
| Mean annual temperature      | polynomial | 0.153  | 19.256 |
| Sum of annual precipitation  | linear     | 0.074  | 20.134 |
| Sum of annual precipitation  | polynomial | 0.104  | 19.806 |
| Aridity Index                | linear     | 0.161  | 19.166 |
| Aridity Index                | polynomial | 0.164  | 19.136 |
| Livestock density            | linear     | 0.172  | 19.047 |
| Livestock density            | polynomial | 0.236  | 18.293 |
| <b>Salt marshes</b>          |            |        |        |

|                             |            |       |        |
|-----------------------------|------------|-------|--------|
| Mean annual temperature     | linear     | 0.307 | 23.555 |
| Mean annual temperature     | polynomial | 0.316 | 23.393 |
| Sum of annual precipitation | linear     | 0.044 | 27.66  |
| Sum of annual precipitation | polynomial | 0.074 | 27.22  |
| Aridity Index               | linear     | 0.082 | 27.111 |
| Aridity Index               | polynomial | 0.104 | 26.782 |
| Livestock density           | linear     | 0.028 | 27.896 |
| Livestock density           | polynomial | 0.081 | 27.128 |

### **Steppes**

|                             |            |       |        |
|-----------------------------|------------|-------|--------|
| Mean annual temperature     | linear     | 0.001 | 22.752 |
| Mean annual temperature     | polynomial | 0.141 | 21.094 |
| Sum of annual precipitation | linear     | 0.098 | 21.62  |
| Sum of annual precipitation | polynomial | 0.112 | 21.448 |
| Aridity Index               | linear     | 0.119 | 21.366 |
| Aridity Index               | polynomial | 0.138 | 21.127 |
| Livestock density           | linear     | 0.001 | 22.747 |
| Livestock density           | polynomial | 0.088 | 21.734 |

---
